# Supplementary material for: Motivation and achievement in EFL: the power of instructional approach
Source: Frontiers journal article supplement (doi:10.3389/feduc.2025.1614388), 2025-06-18
Supplement: Data_Sheet_1.docx [file Data_Sheet_1.docx]

Supplementary Material

# Supplementary Results in Preliminary Tests


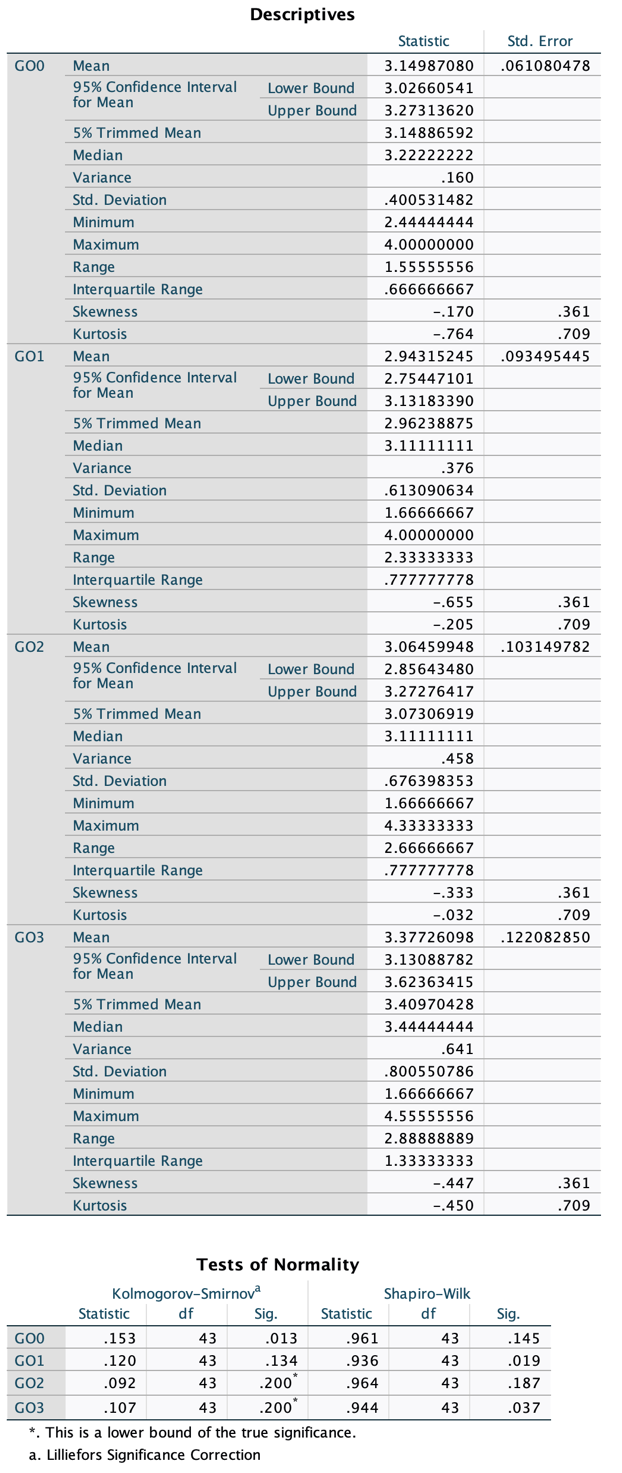


Supplementary Figure 1. Goal orientation results in normality tests


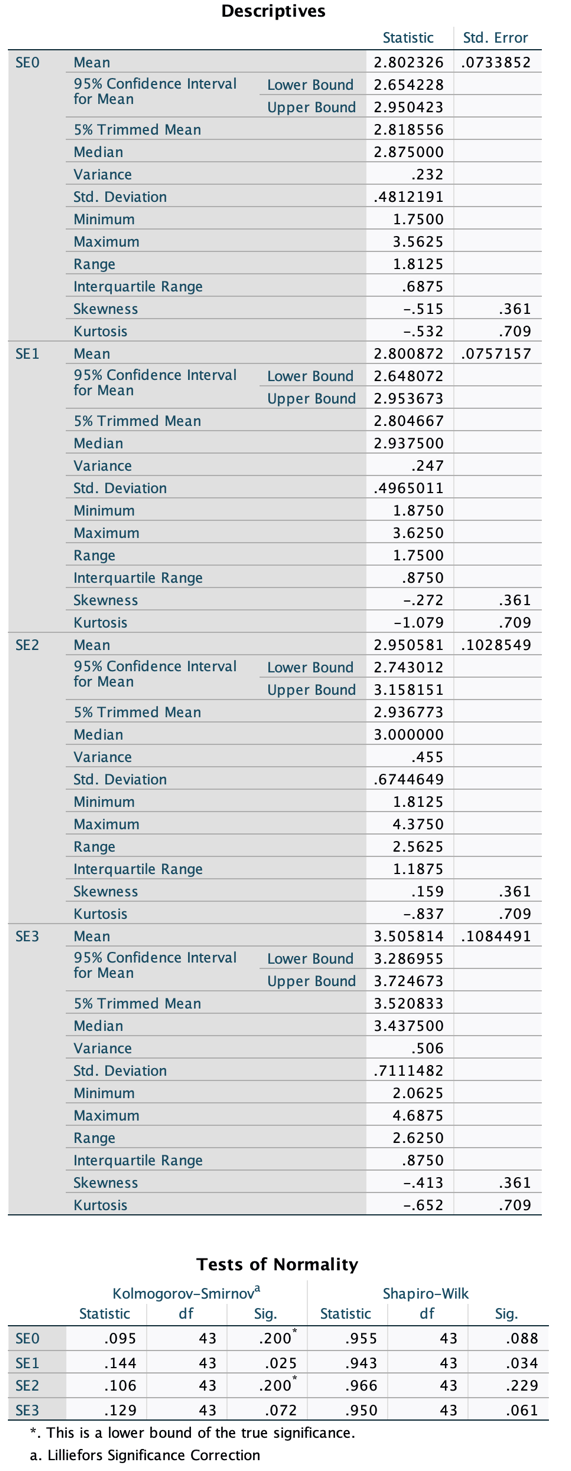


Supplementary Figure 2. Self-efficacy results in normality tests


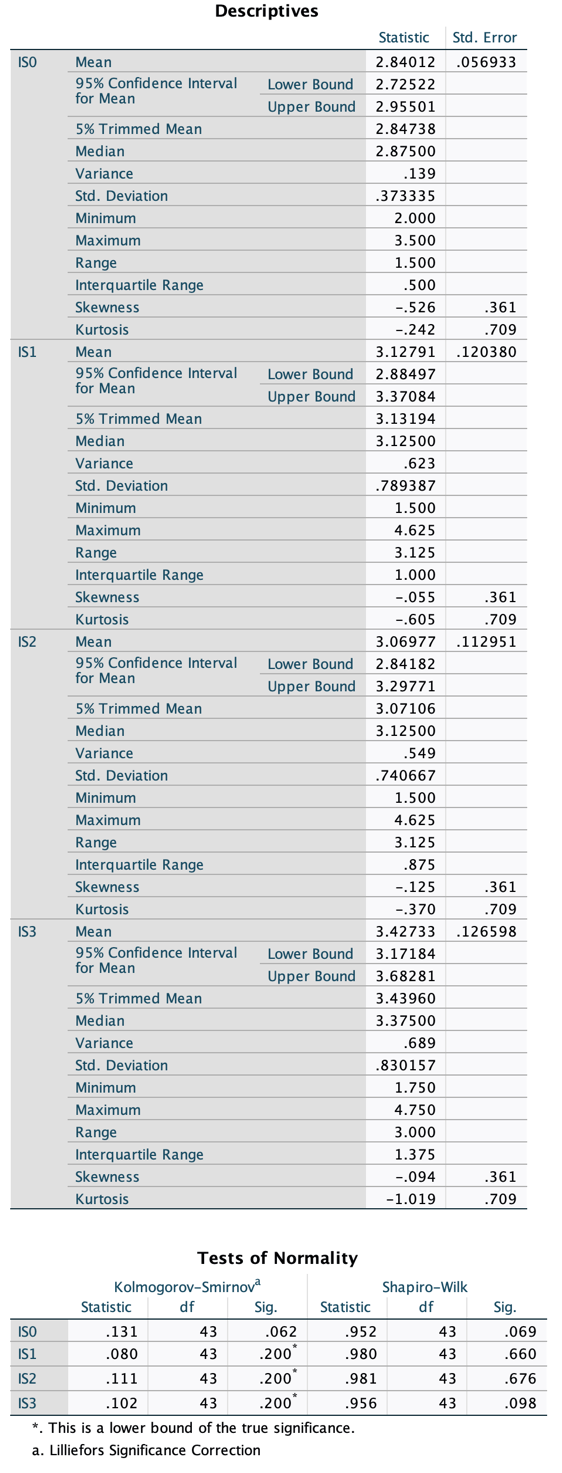


Supplementary Figure 3. Instructional support results in normality tests


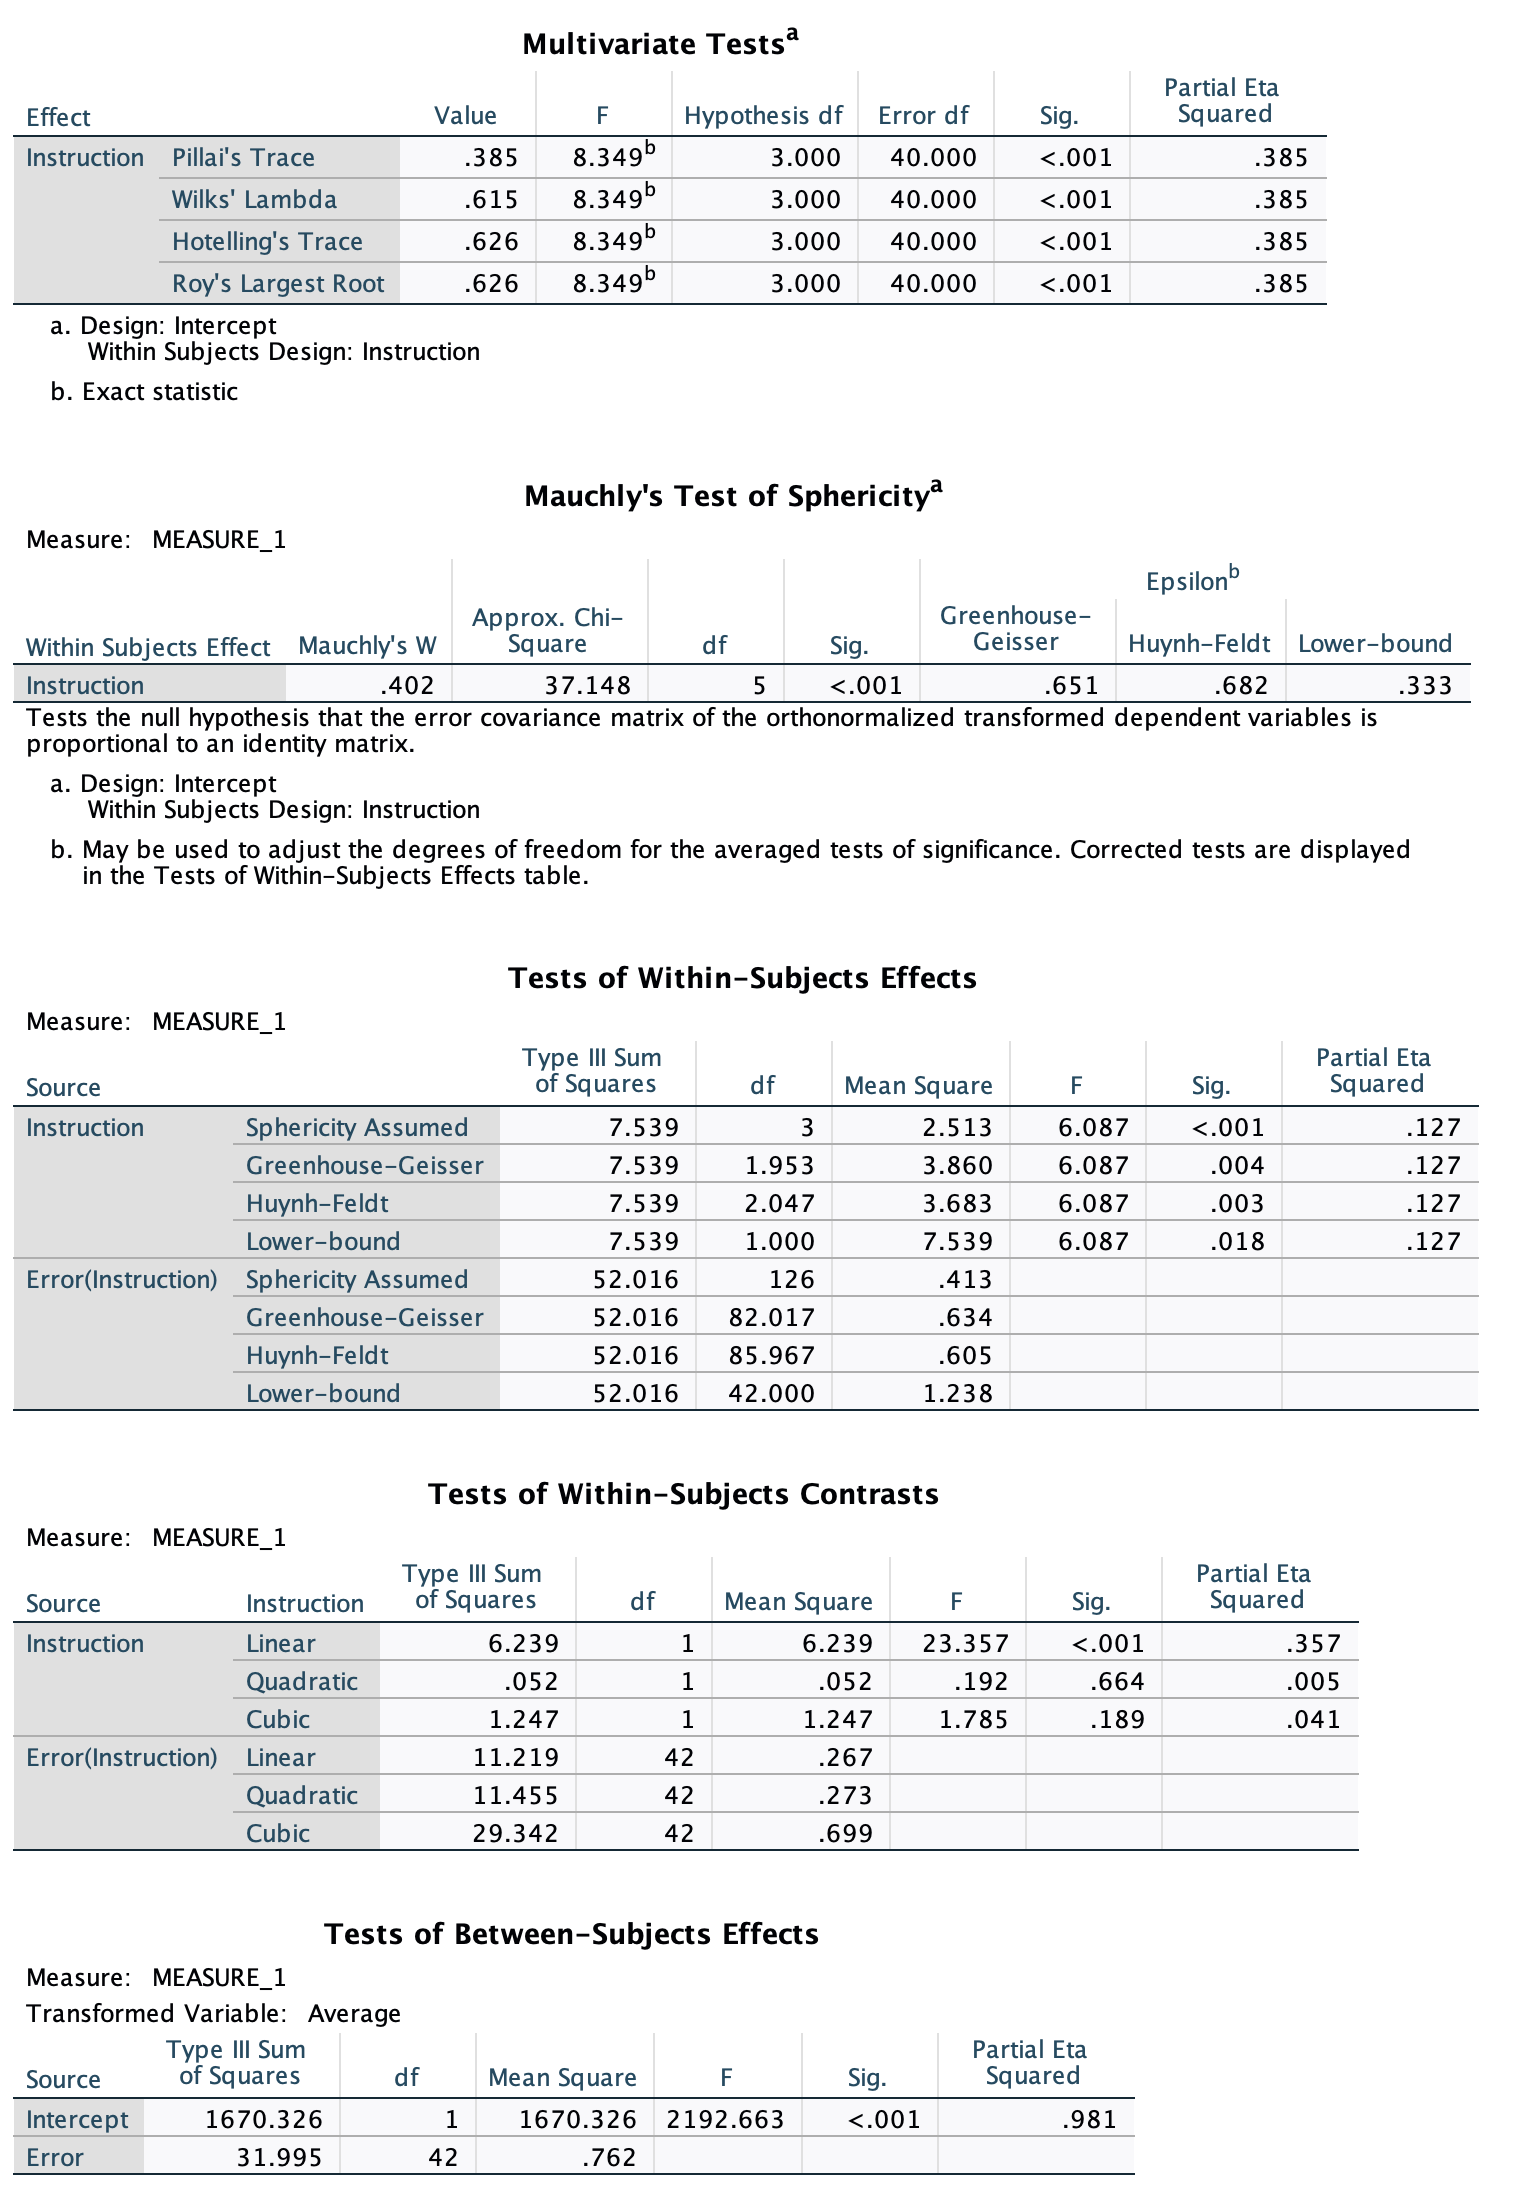


Supplementary Figure 4. Instructional support results in Mauchly's Test of Sphericity


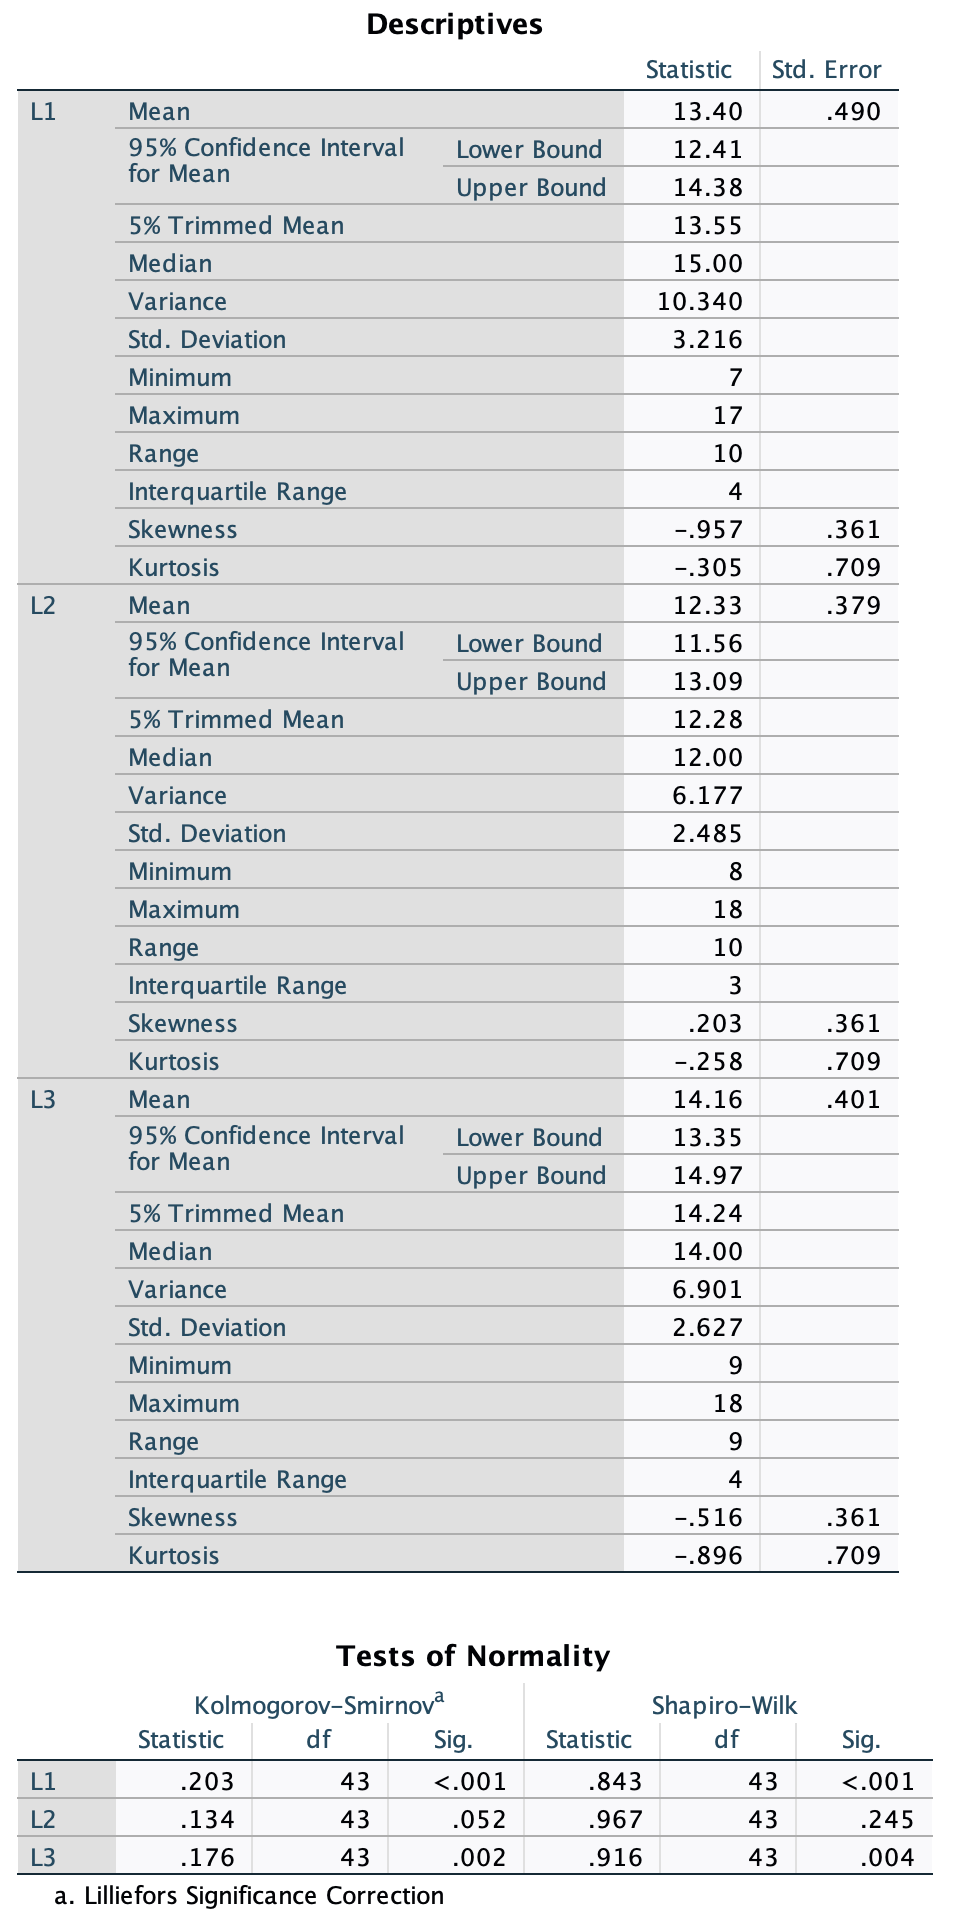


Supplementary Figure 5. Listening results in normality tests


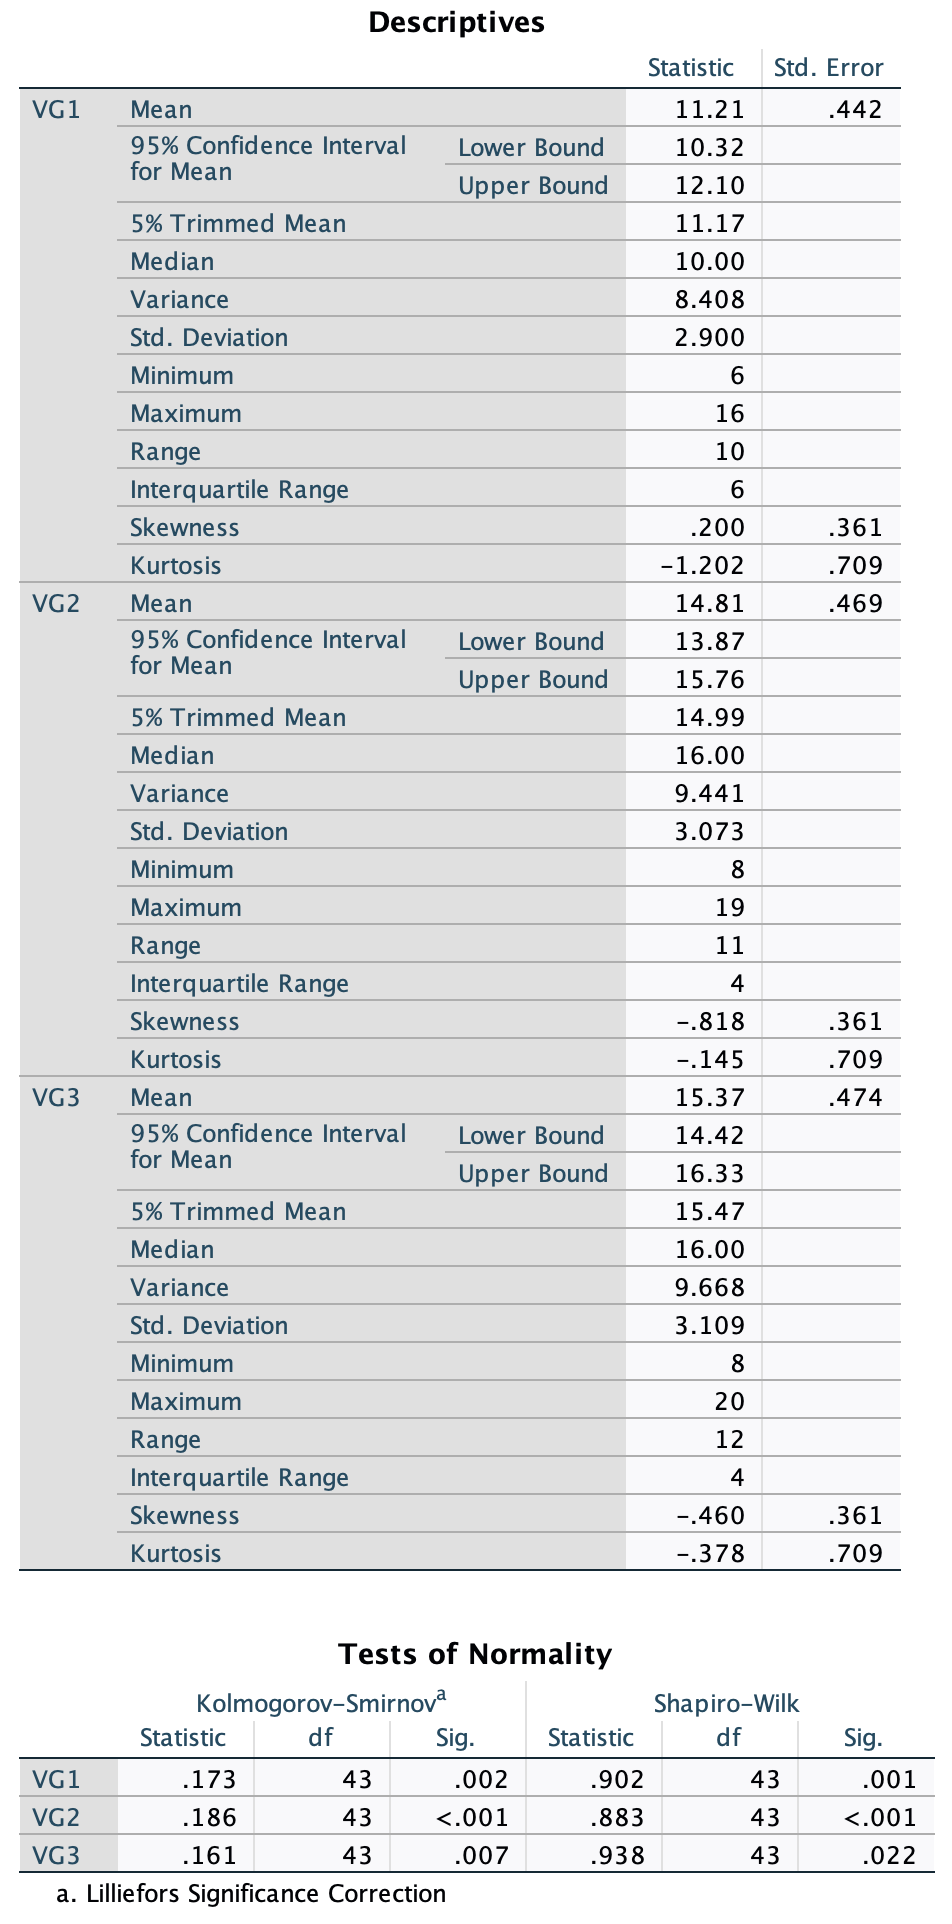


Supplementary Figure 6. Vocabulary and Grammar results in normality tests


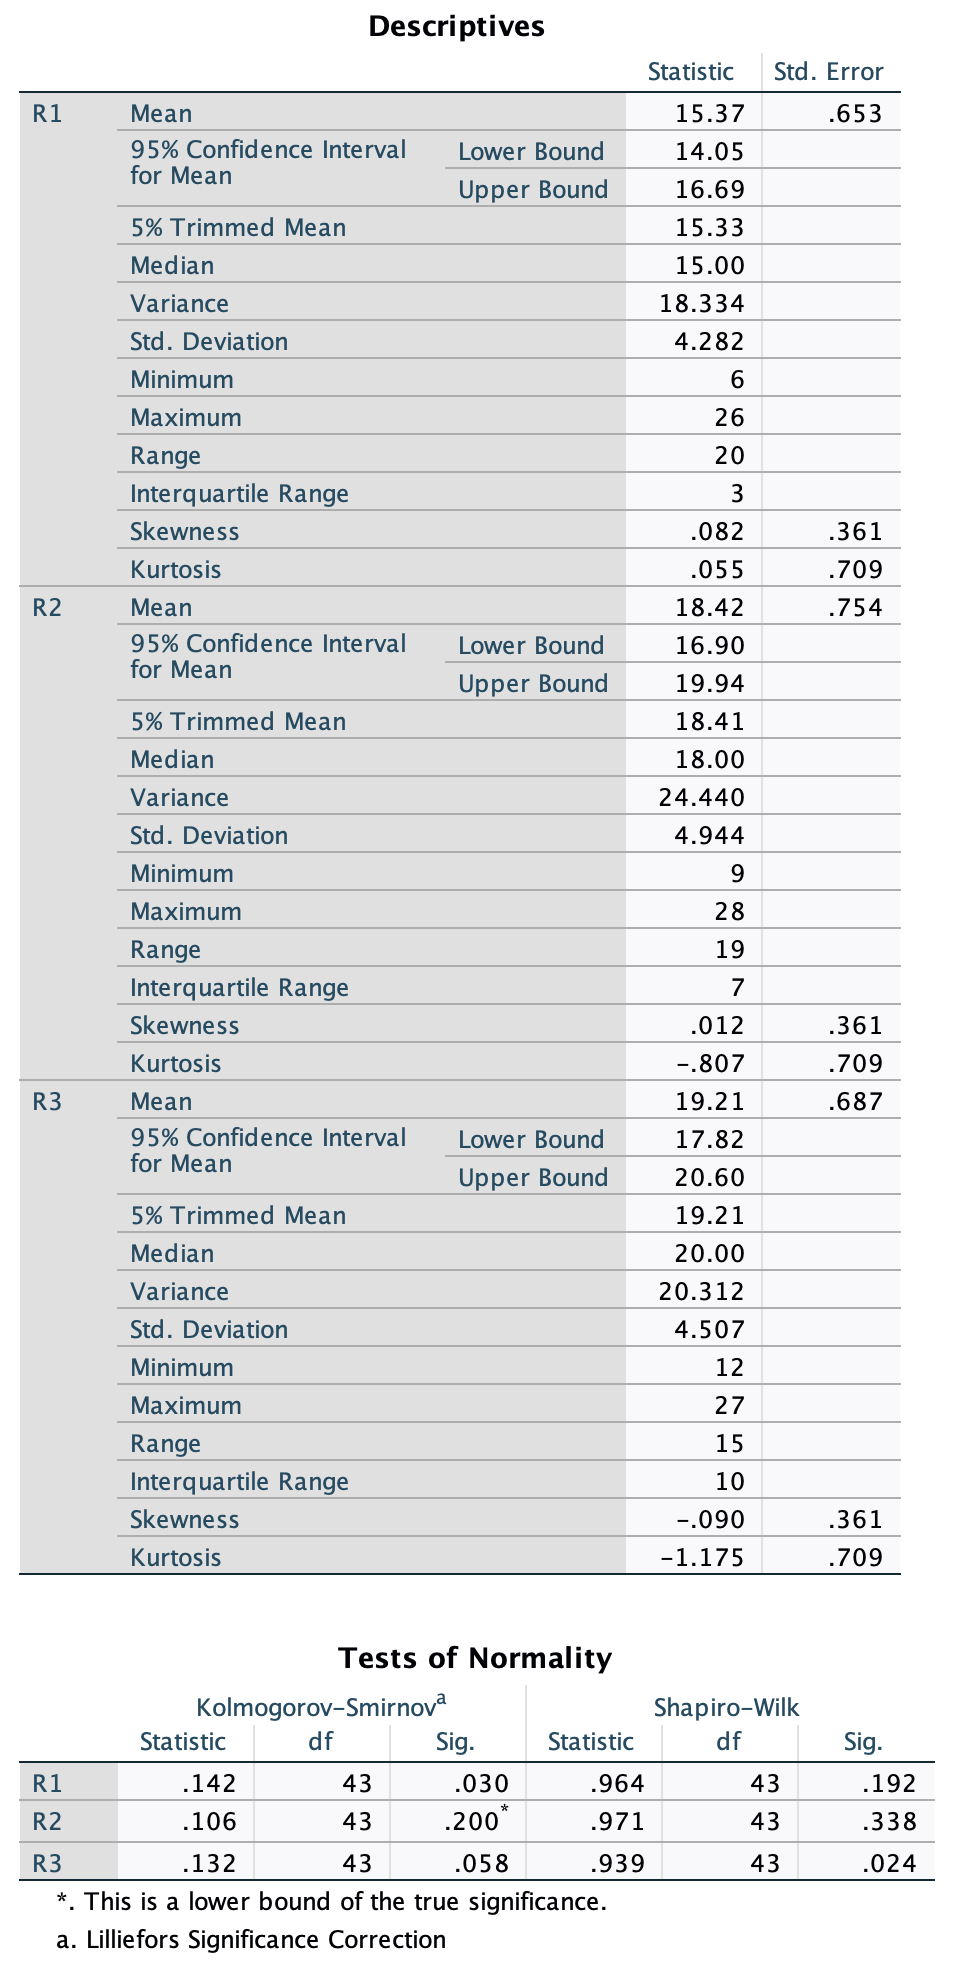


Supplementary Figure 7. Reading results in normality tests


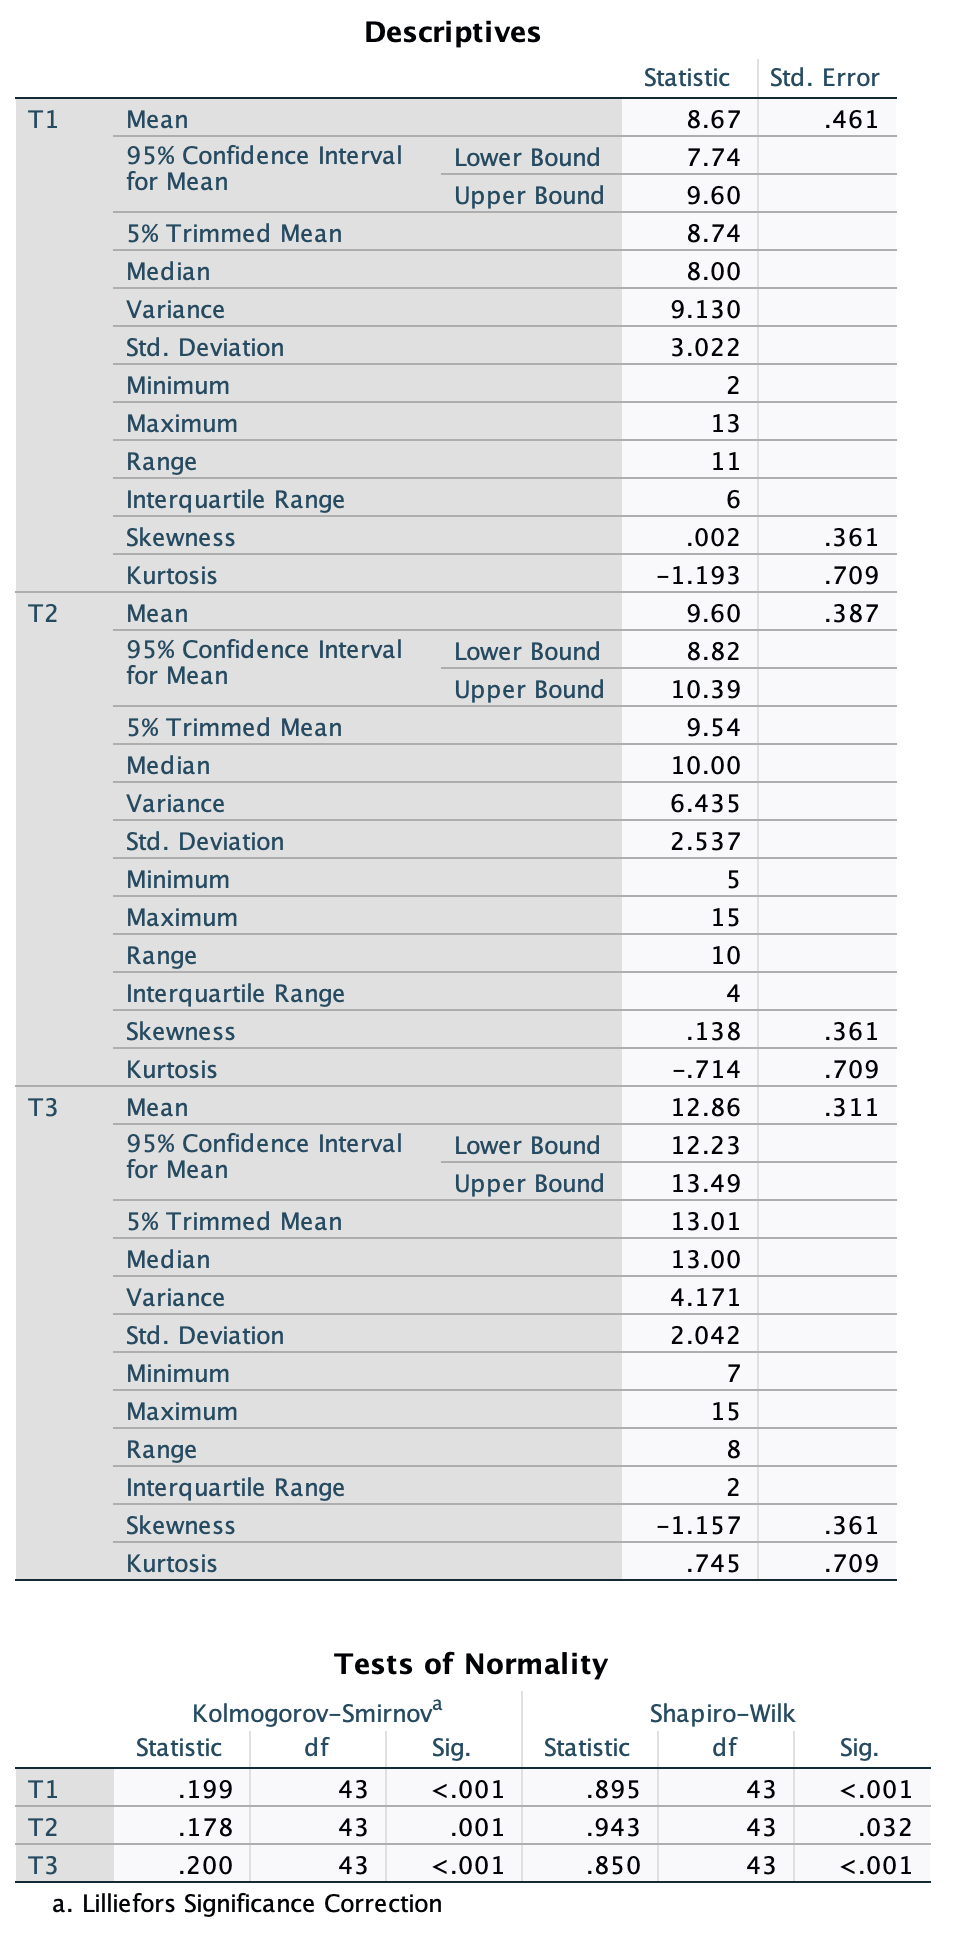


Supplementary Figure 8. Translation results in normality tests


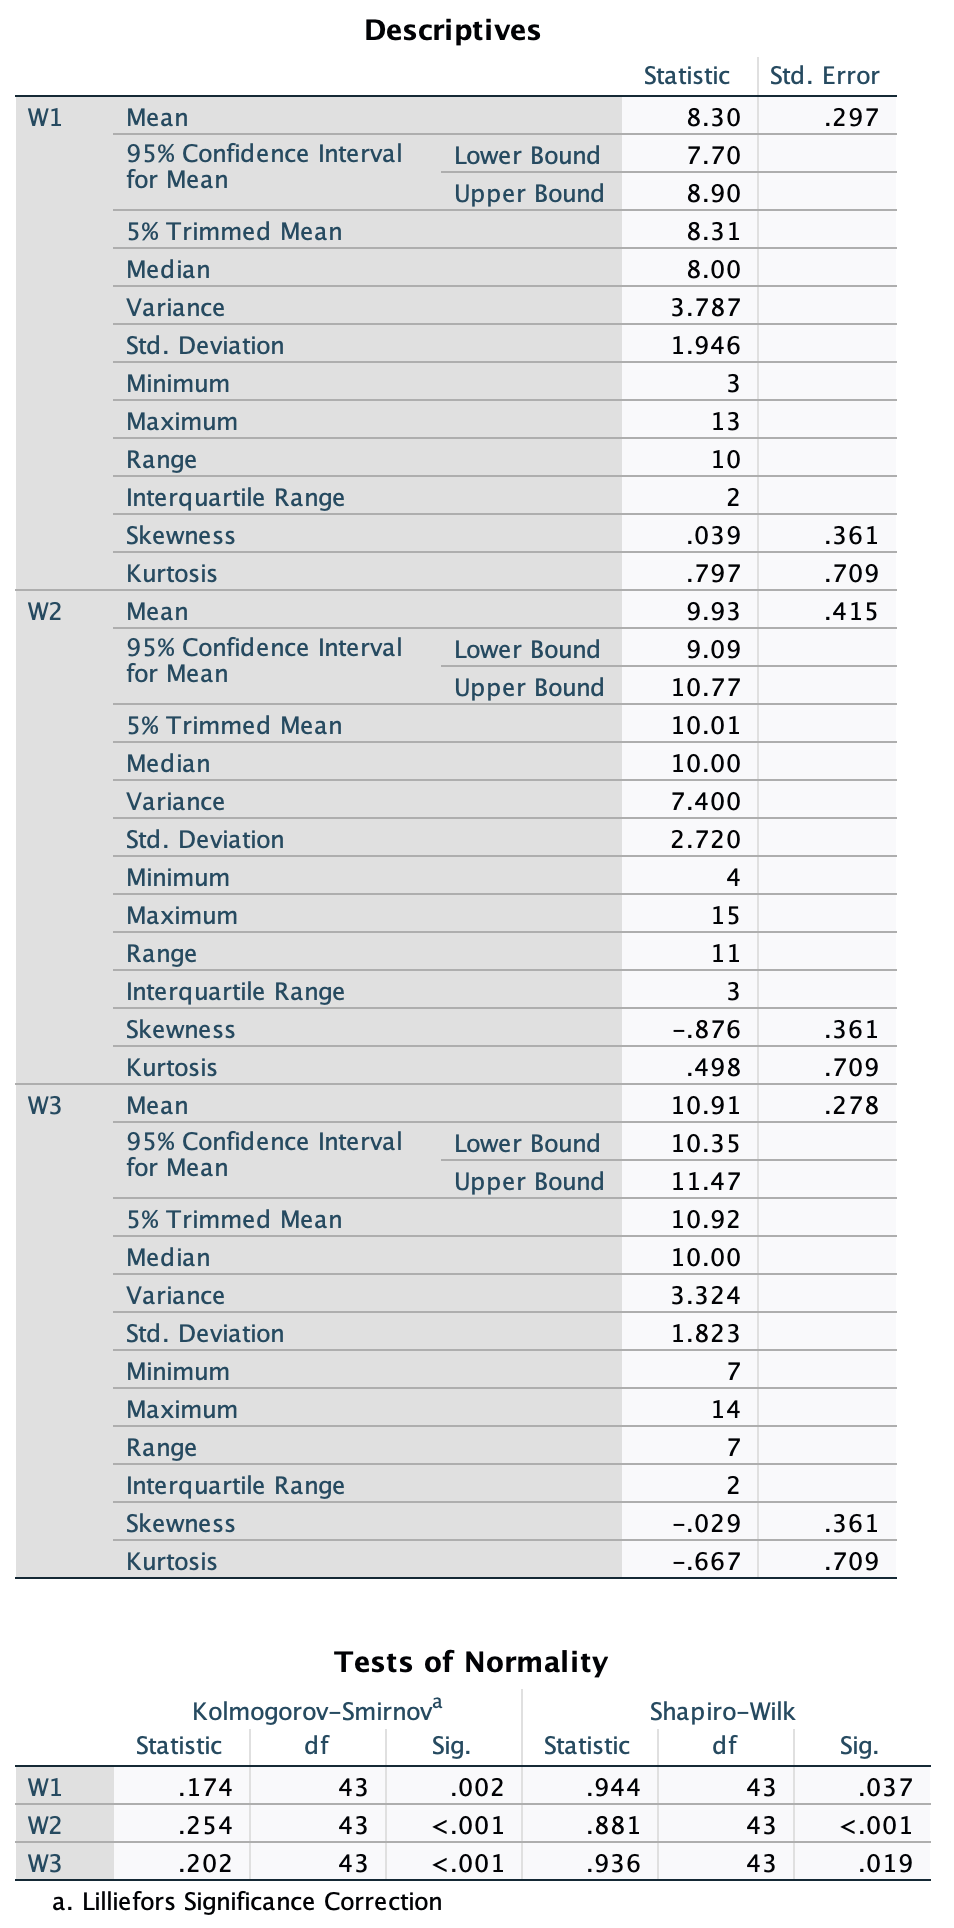


Supplementary Figure 9. Writing results in normality tests


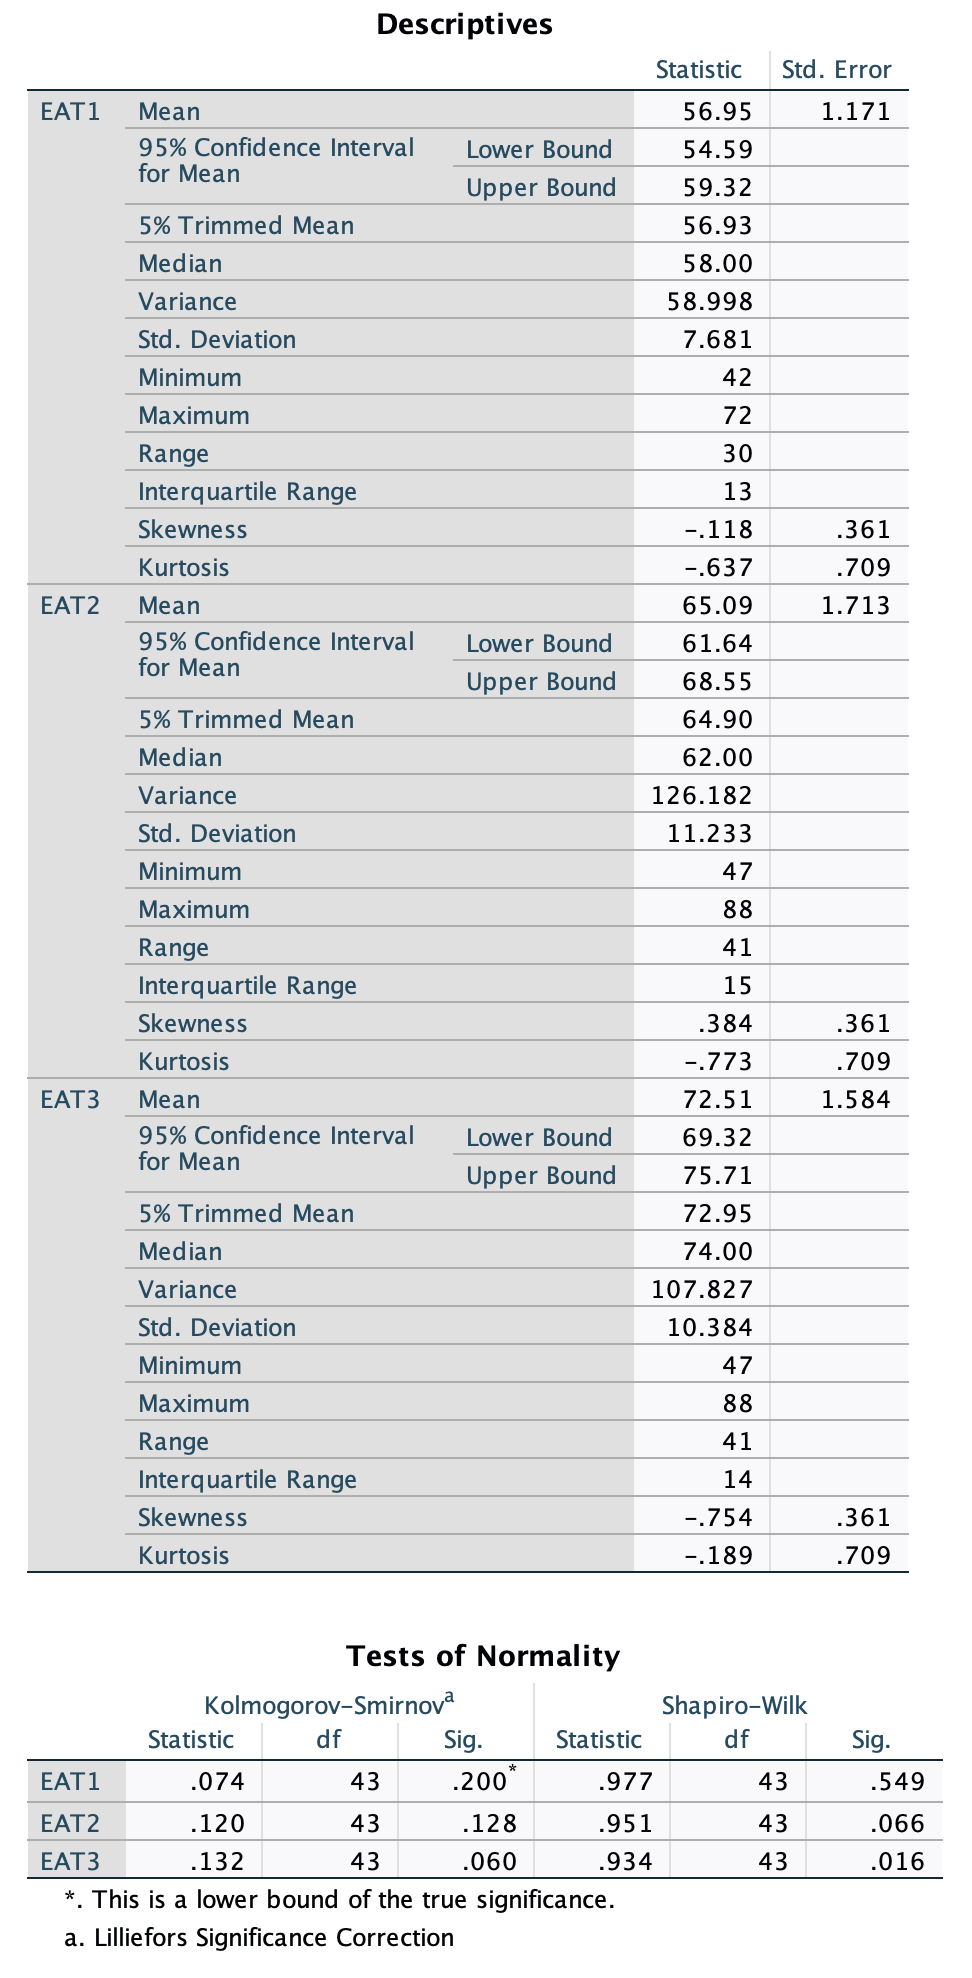


Supplementary Figure 10. English achievement test results in normality tests
